# Supplementary material for: Histopathology images predict multi-omics aberrations and prognoses in colorectal cancer patients
Source: PubMed Central journal article supplement (PMC10102208; doi:10.1038/s41467-023-37179-4), 2023-04-13
Supplement: 41467_2023_37179_MOESM1_ESM.pdf [file 41467_2023_37179_MOESM1_ESM.pdf]

## Supplementary Information

### **Supplementary Figure 1. MOMA predicted survival outcomes of stage I and II colorectal cancer patients receiving surgery only, and stage III cancer patients without neoadjuvant therapy using digital histopathology images.**

(A) MOMA successfully distinguished the overall shorter-term survivors from longer-term survivors using histopathology images (two-sided log-rank test P-value = 0.015) of stage I and stage II patients receiving surgery only. (B) Among stage I and stage II patients without radiotherapy or chemotherapy, MOMA successfully distinguished progression-free survival groups using histopathology images (two-sided log-rank test P-value = 0.047). (C) MOMA successfully distinguished the overall shorter-term survivors from longer-term survivors using histopathology images (log-rank test P-value = 0.024) of stage III patients without neoadjuvant therapy. (D) Among stage III patients without neoadjuvant therapy, MOMA successfully distinguished the progression-free survival groups using histopathology images (log-rank test P-value = 0.018).

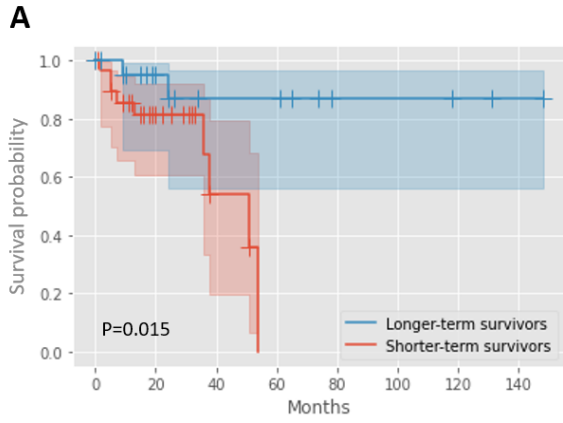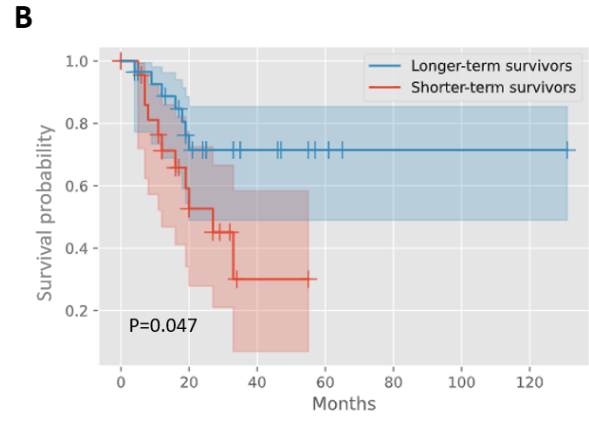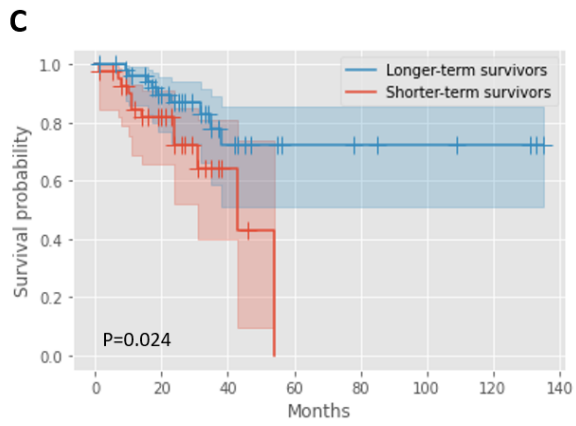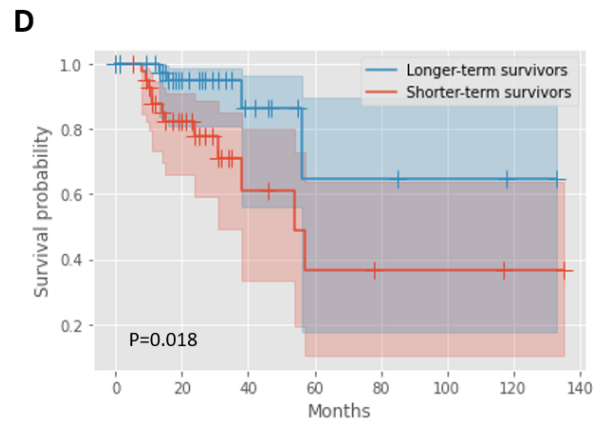

## **Supplementary Figure 2. MOMA characterized pathology imaging signals**

**correlated with the expression level of the *BECN1* gene.** (A) MOMA identified a moderate association between histopathology imaging and the expression level of *BECN1*. Performance in the TCGA held-out test set was shown. (B) We successfully validated the MOMA-based prediction model in the Nurses' Health Study and Health Professionals Follow-Up Study cohorts, demonstrating the validity of the identified associations. (C) Attention visualization of *BECN1*-low histopathology images. (D) Attention visualization of *BECN1*-high histopathology images. Regions of cancer cells received a high attention level from the *BECN1* prediction model. Both mucosa and tumor receive high attention weights in *BECN1* prediction. In *BECN1*-low, the model pays more attention to the cancer-associated stroma, but in *BECN1*-high, the model focuses more on lymphocytes. MUC: mucus; TUM: colorectal adenocarcinoma epithelium; STR: cancer-associated stroma; LYM: lymphocytes.

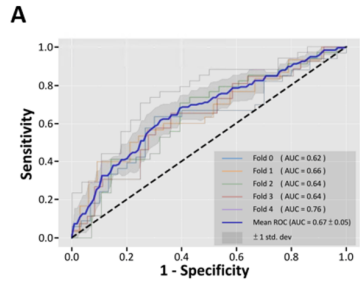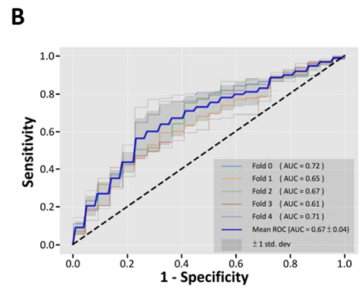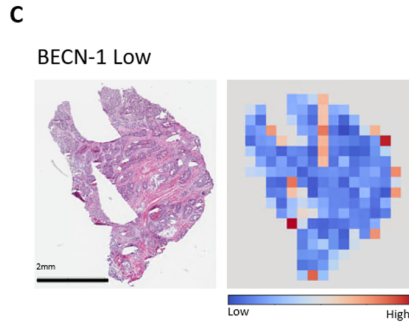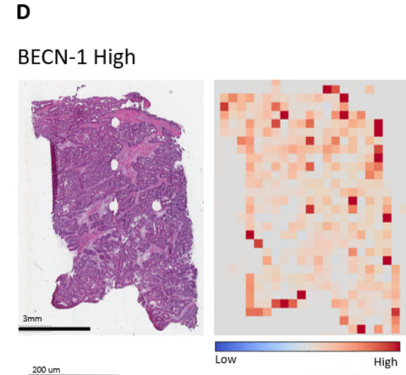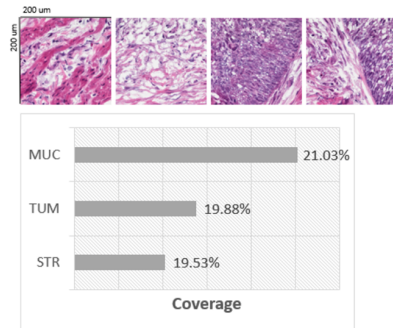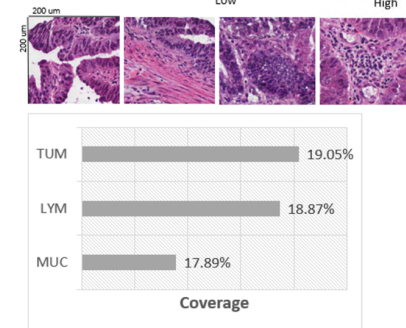

**Supplementary Figure 3. MOMA identified the association between *BRAF***

**c.1799T>A (p.V600E) mutation and histopathology image patterns. (A) MOMA**

characterized a moderate correlation between *BRAF* c.1799T>A (p.V600E) mutation and histopathology image features. Results from the TCGA held-out test set were shown. (B) Attention visualization of a histopathology image from a *BRAF* wild-type patient. (C) Attention visualization of a histopathology image from a *BRAF* c.1799T>A

(p.V600E) mutation patient. Regions of muscle, stroma, cancers, and mucus received high attention in this molecular classification task. TUM: colorectal adenocarcinoma epithelium; STR: cancer-associated stroma; MUC: mucus; MUS: smooth muscle.

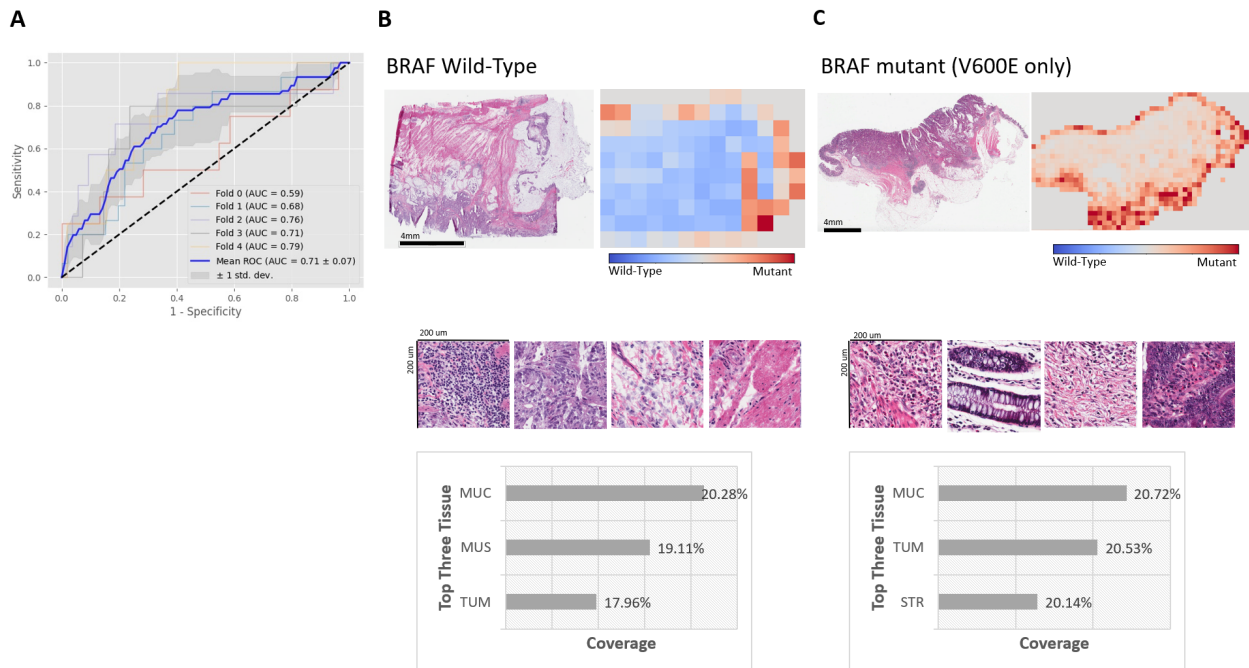

## Supplementary Figure 4. MOMA identified the association between *BRAF*

mutations at any loci and histopathology image patterns. (A) MOMA characterized a moderate correlation between *BRAF* mutation and histopathology image features. Results from the TCGA held-out test set were shown. (B) The same model generated by MOMA was validated in the Nurses' Health Study and Health Professionals Follow-Up Study cohorts. (C) Attention visualization of a histopathology image from a *BRAF* wild-type patient. (D) Attention visualization of a histopathology image from a *BRAF*-mutated patient. Regions of stroma, cancers, and mucus received high attention in this molecular classification task. STR: cancer-associated stroma; MUC: mucus; TUM: colorectal adenocarcinoma epithelium.

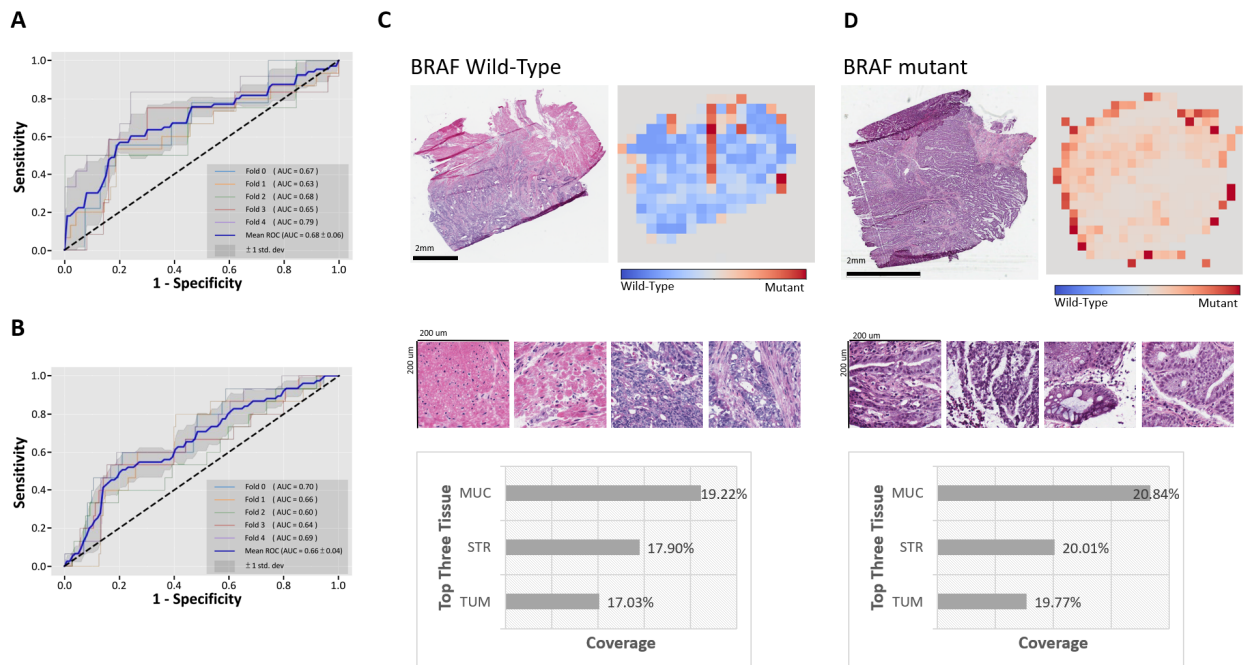

**Supplementary Figure 5. MOMA weakly predicts overexpression of the *HIF1A* gene using histopathology images.** (A) Performance in the TCGA held-out test set was shown. (B) The results are validated in the Nurses' Health Study and Health Professionals Follow-up Study cohorts.

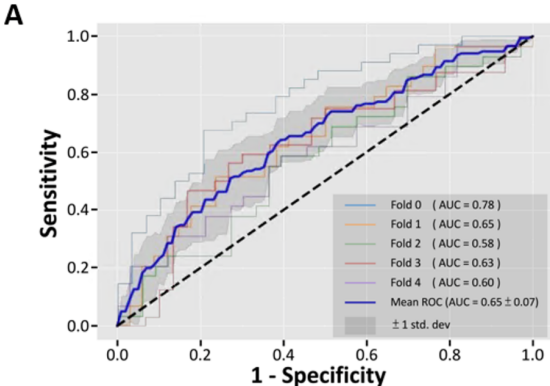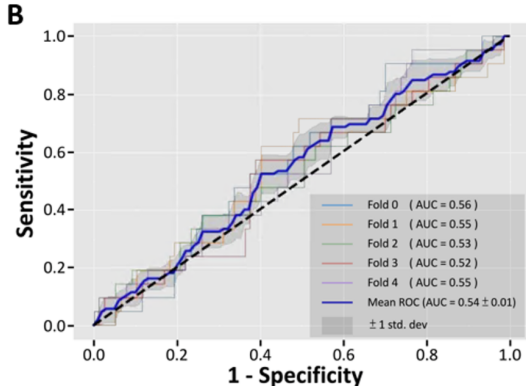

**Supplementary Figure 6. MOMA identified a moderate association between histopathology images and *PIK3CA* mutation status.** (A) Performance in the TCGA held-out test set was shown. (B) The results are validated in the Nurses' Health Study and Health Professionals Follow-up Study cohorts.

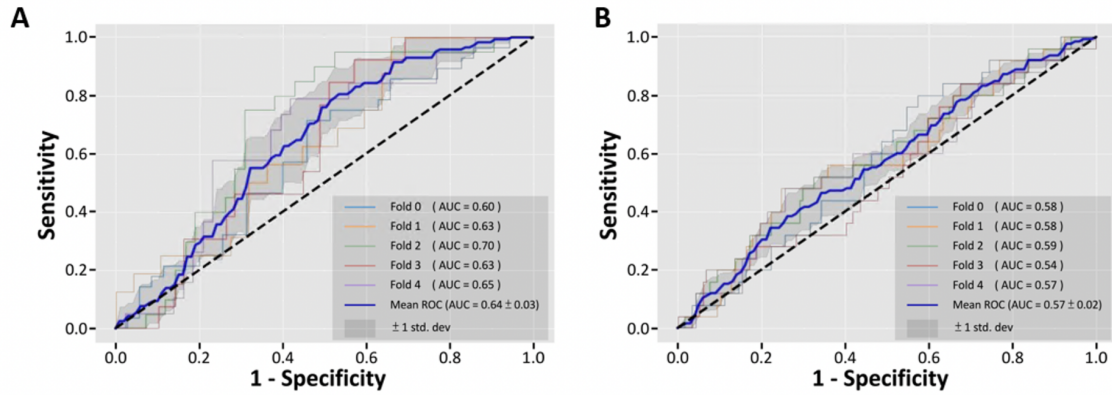



**Supplementary Figure 7. MOMA associates histopathology image patterns with the CpG Island Methylator Phenotype (CIMP).** (A) CIMP prediction performance in the TCGA held-out test set. (B) Our CIMP prediction model was validated in the Nurses' Health Study and Health Professionals Follow-up Study cohorts. (C) Attention visualization of non-CIMP-high histopathology images. (D) Attention visualization of CIMP-high histopathology images. TUM: colorectal adenocarcinoma epithelium; STR: cancer-associated stroma; MUC: mucus; LYM: lymphocytes.

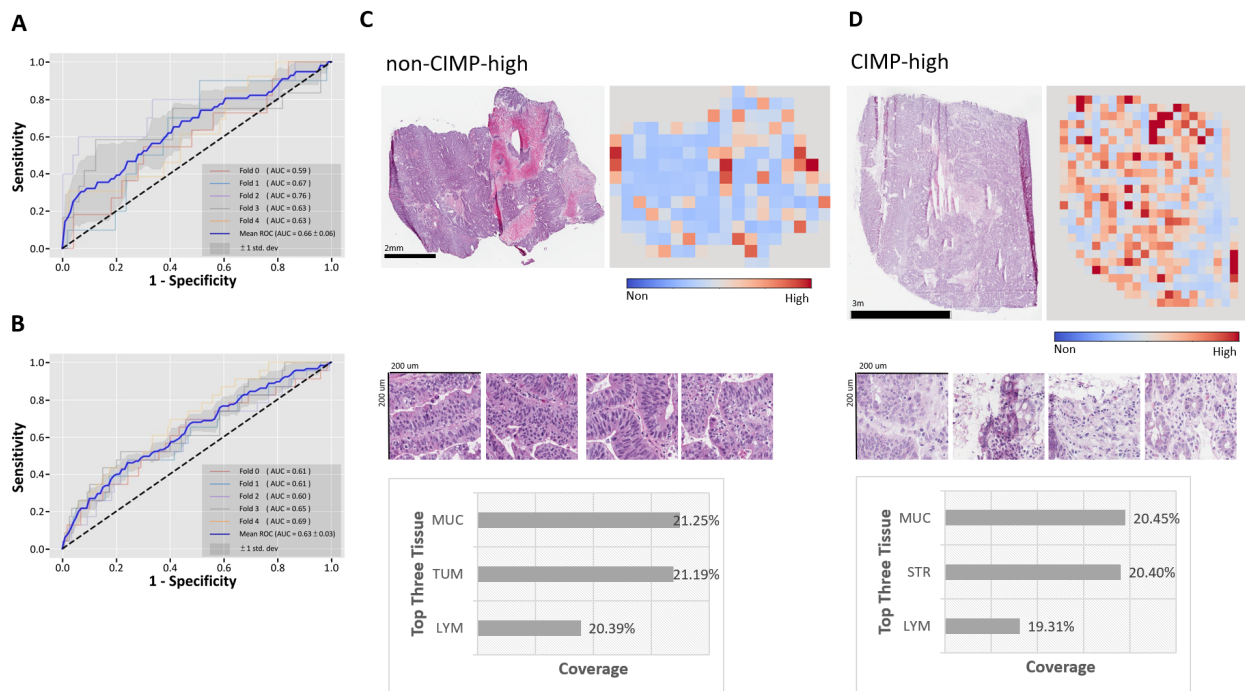

## Supplementary Figure 8. MOMA identified the association between CMS and histopathology image patterns.

(A) MOMA characterized a moderate correlation between CMS2 and CMS4 in histopathology image features. Results from the TCGA held-out test set were shown. (B) Attention visualization of a histopathology image from a CMS2 patient. (C) Attention visualization of a histopathology image from a CMS4 patient. Regions of stroma, cancers, lymphocytes, and mucus received high attention in this molecular classification task. MUC: mucus; TUM: colorectal adenocarcinoma epithelium; STR: cancer-associated stroma; LYM: lymphocytes.

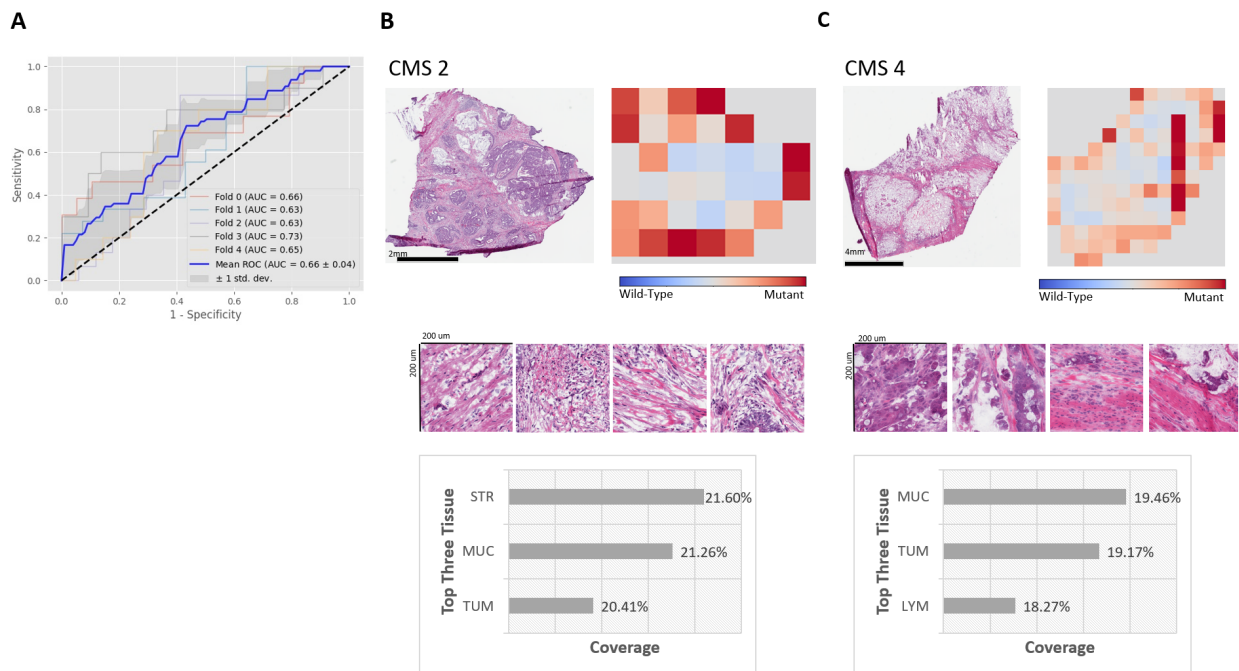

**Supplementary Table 1.** Additional model performance metrics for multi-omics characterization via histopathology image analyses.

|                                                | Dataset  | Accuracy                          | Precision | Sensitivity<br>(i.e.,<br>Recall) | Specificity | AUROC |
|------------------------------------------------|----------|-----------------------------------|-----------|----------------------------------|-------------|-------|
| Microsatellite<br>Instability                  | TCGA     | 0.80                              | 0.75      | 0.89                             | 0.75        | 0.88  |
|                                                | NHS-HPFS | 0.76                              | 0.67      | 0.86                             | 0.57        | 0.76  |
| <i>BRAF</i> Mutation<br>c.1799T>A<br>(p.V600E) | TCGA     | 0.67                              | 0.63      | 0.78                             | 0.61        | 0.71  |
|                                                | NHS-HPFS | Mutation Loci Not Available       |           |                                  |             |       |
| <i>BECN1</i><br>Overexpression                 | TCGA     | 0.60                              | 0.58      | 0.73                             | 0.61        | 0.67  |
|                                                | NHS-HPFS | 0.85                              | 0.83      | 0.67                             | 0.64        | 0.67  |
| CpG Island<br>Methylator<br>Phenotype          | TCGA     | 0.77                              | 0.65      | 0.68                             | 0.55        | 0.66  |
|                                                | NHS-HPFS | 0.68                              | 0.63      | 0.67                             | 0.53        | 0.63  |
| Consensus<br>Molecular Subtypes                | TCGA     | 0.69                              | 0.86      | 0.73                             | 0.57        | 0.66  |
|                                                | NHS-HPFS | Transcriptomic Data Not Available |           |                                  |             |       |

\* Gene names are italicized

**Supplementary Table 2.** Performance comparison between MOMA, a patch-based standard convolutional neural network, and a previously published method (Kather et al.) in MSI prediction (two-sided Wilcoxon signed-rank test).

|                                             | MOMA | Patch-based     | Kather et al. |
|---------------------------------------------|------|-----------------|---------------|
| Fold 1                                      | 0.92 | 0.85            | -             |
| Fold 2                                      | 0.92 | 0.87            | -             |
| Fold 3                                      | 0.79 | 0.78            | -             |
| Fold 4                                      | 0.94 | 0.94            | -             |
| Fold 5                                      | 0.89 | 0.85            | -             |
| Mean AUROC                                  | 0.88 | 0.85            | 0.84          |
| Two-sided Wilcoxon Signed-Rank Test P-Value | -    | Not significant |               |

**Supplementary Table 3.** Performance comparison between MOMA and PC-CHiP in copy number variation prediction.

|                               | Gene      | P-value         |
|-------------------------------|-----------|-----------------|
| Deletion in Colon Cancer      | FAT1      | Not significant |
|                               | PPP2R2A   | 3.08E-07        |
|                               | FHIT      | 7.21E-62        |
|                               | PTEN      | Not significant |
|                               | LINC00290 | 1.80E-136       |
|                               | MACROD2   | Not significant |
|                               | CSMD1     | Not significant |
| Amplification in Colon Cancer | BCL2L1    | 2.71E-168       |
|                               | ZNF217    | Not significant |
| Deletion in Rectal Cancer     | PPP2R2A   | 2.34E-87        |
|                               | MACROD2   | 2.06E-28        |
|                               | CSMD1     | 6.15E-54        |

**Supplementary Table 4.** Performance of whole-genome doubling prediction of MOMA compared with that of PC-CHiP (two-sided Wilcoxon signed-rank test).

|                                                        | Colon Cancer    |         | Rectal Cancer |         |
|--------------------------------------------------------|-----------------|---------|---------------|---------|
|                                                        | MOMA            | PC-CHiP | MOMA          | PC-CHiP |
| Area Under the Receiver Operating Characteristic Curve | 0.72            | 0.65    | 0.63          | 0.51    |
| Two-sided Wilcoxon Signed Rank Test P-Value            | Not significant |         | 5.12E-19      |         |
